# Supplementary material for: Bring More Data!—A Good Advice? Removing Separation in Logistic Regression by Increasing Sample Size
Source: PubMed Central journal article supplement (PMC6926877; doi:10.3390/ijerph16234658), 2019-11-22
Supplement: ijerph-16-04658-s001.pdf [file ijerph-16-04658-s001.pdf]

# Bring more data! – a good advice? Removing separation in logistic regression by increasing sample size

Hana Šinkovec, Angelika Geroldinger and Georg Heinze

## Supplementary Materials:

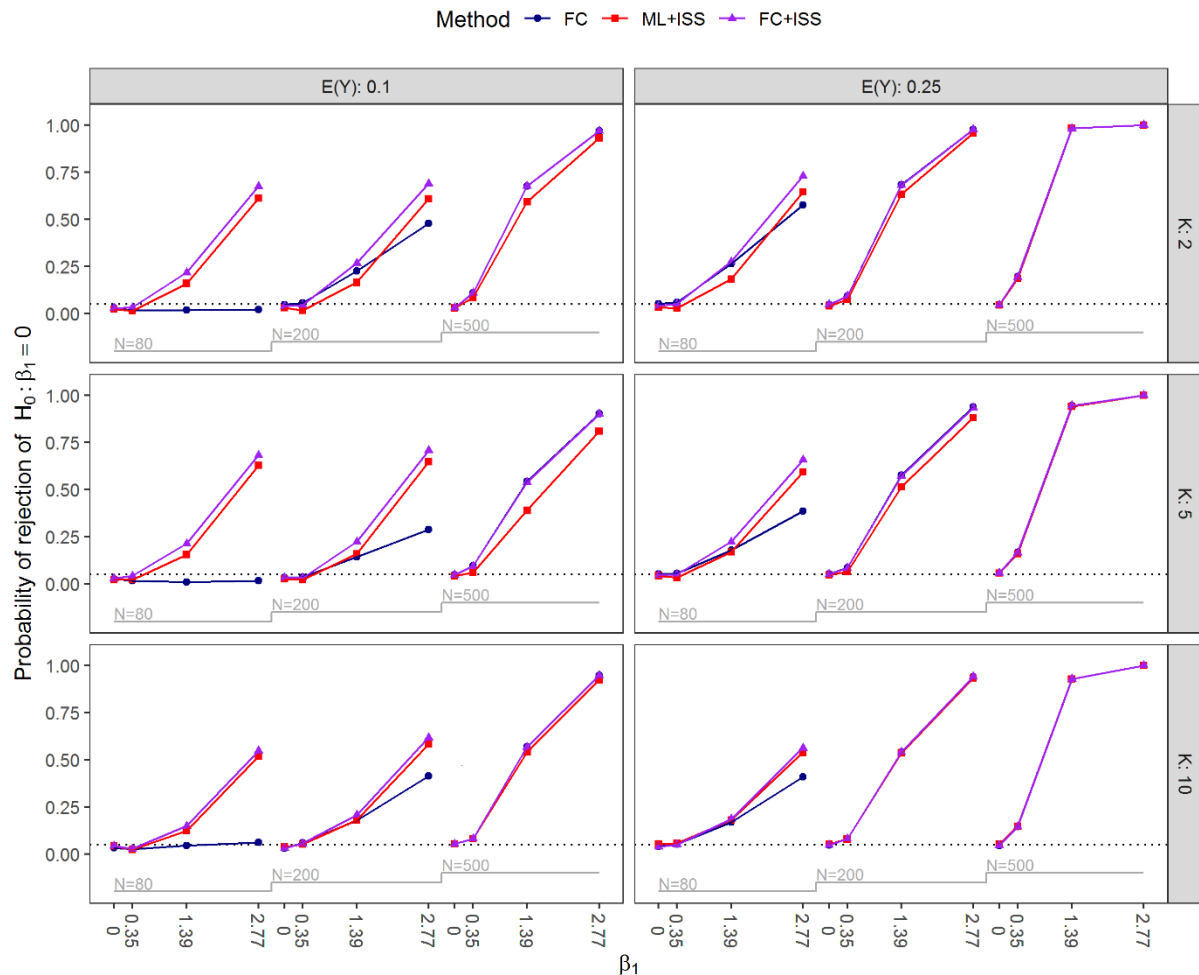

**Figure S1.** Nested loop plot showing type I error rate ( $\beta_1 = 0$ ) and power ( $\beta_1 \neq 0$ ) for  $\hat{\beta}_1$  by the expected value of  $Y$ ,  $E(Y) \in \{0.1, 0.25\}$ , the number of covariates  $K \in \{2, 5, 10\}$ , the value of  $\beta_1 \in \{0, 0.35, 1.39, 2.77\}$  and the sample size  $N \in \{80, 200, 500\}$  for all simulated scenarios. FC, Firth's correction; ML+ISS, maximum likelihood combined with the increasing sample size approach; FC+ISS, Firth's correction combined with the increasing sample size approach.

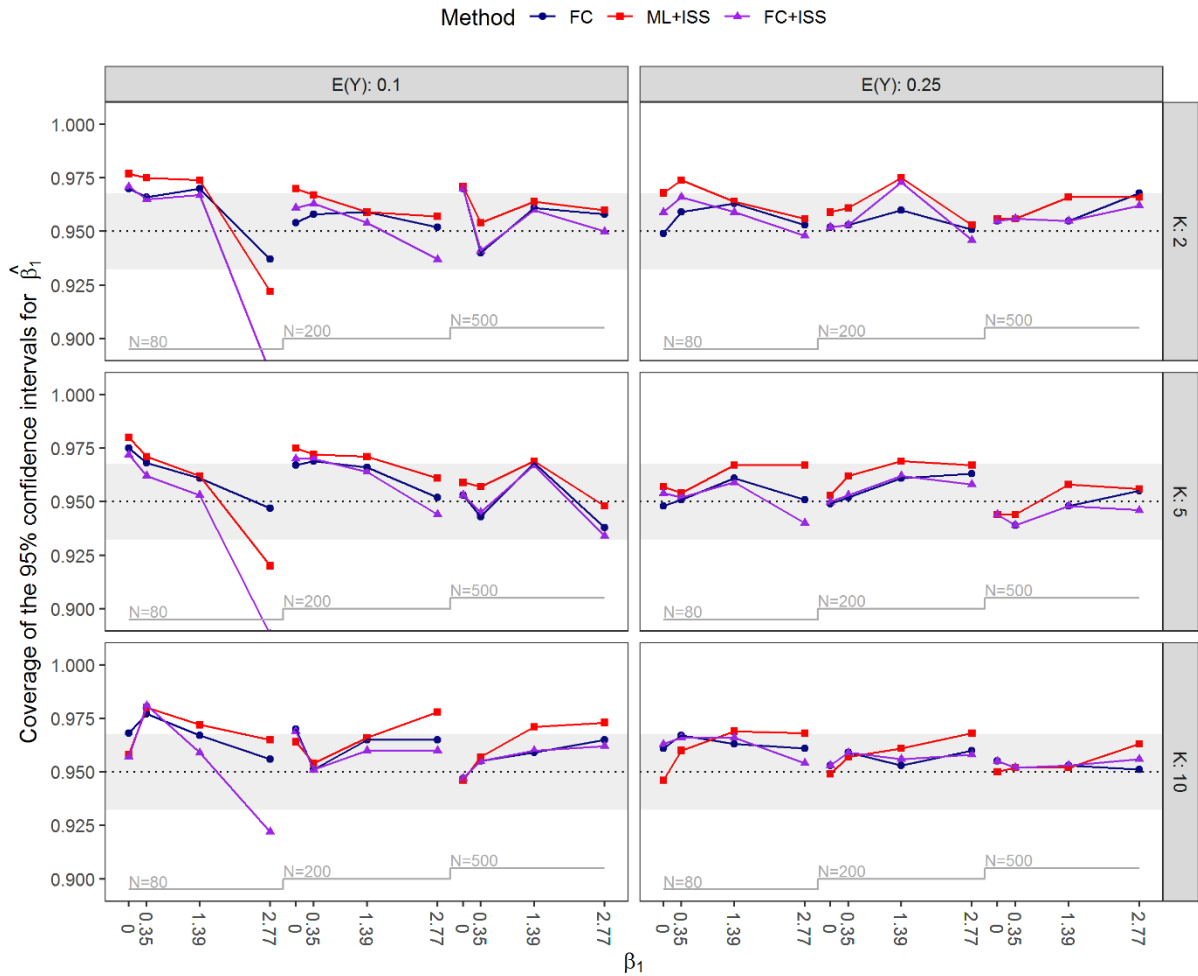

**Figure S2.** Nested loop plot of coverage of the 95% confidence intervals for  $\hat{\beta}_1$  by the expected value of  $Y$ ,  $E(Y) \in \{0.1, 0.25\}$ , the number of covariates  $K \in \{2, 5, 10\}$ , the value of  $\beta_1 \in \{0, 0.35, 1.39, 2.77\}$  and the sample size  $N \in \{80, 200, 500\}$  for all simulated scenarios. The grey shaded area marks the ‘plausible’ interval  $0.95 \pm 2.57\sqrt{\frac{0.95-0.05}{1000}}$ , into which the result of a method with perfect coverage falls with a probability of 0.99. FC, Firth’s correction; ML+ISS, maximum likelihood combined with the increasing sample size approach; FC+ISS, Firth’s correction combined with the increasing sample size approach.

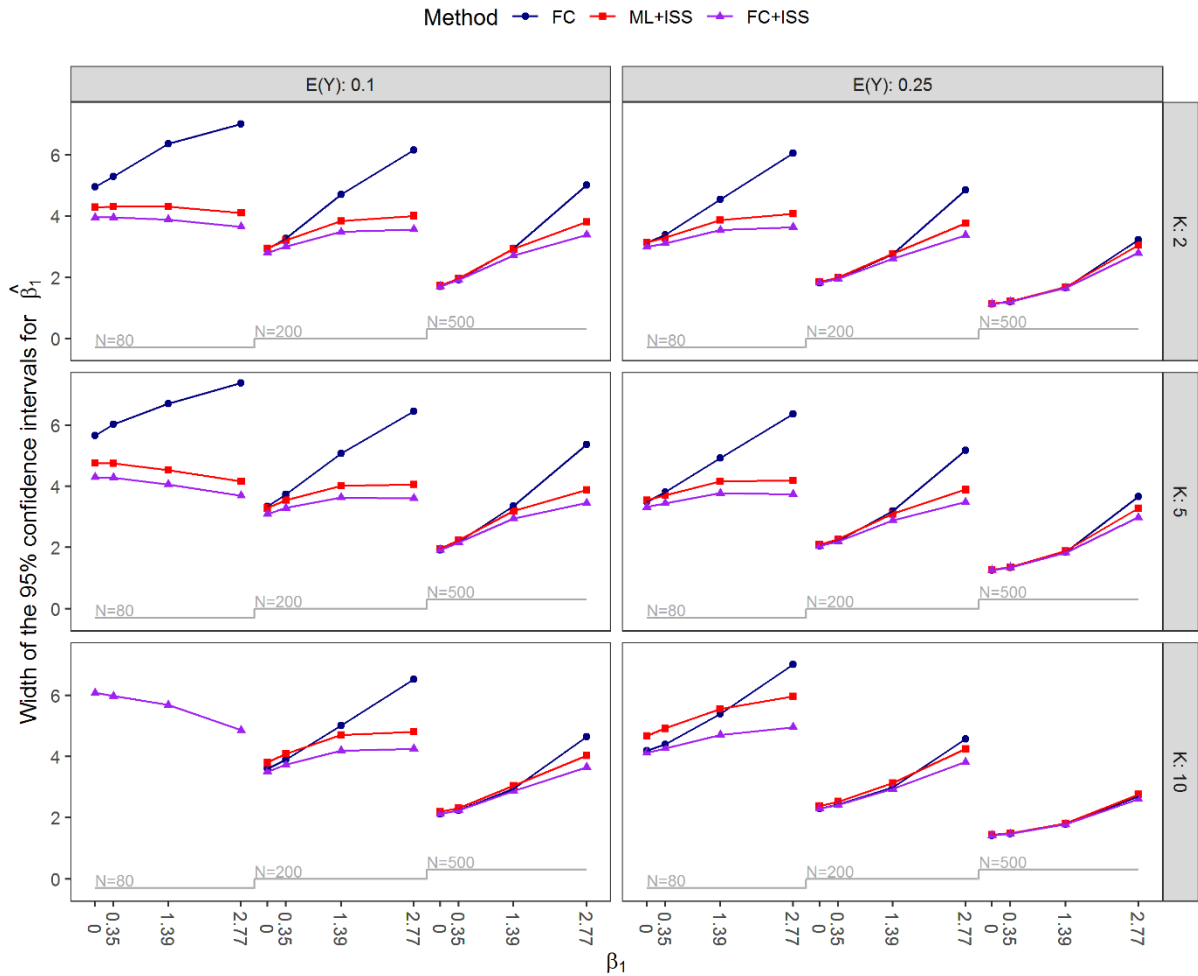

**Figure S3.** Nested loop plot of width of the 95% confidence intervals for  $\hat{\beta}_1$  by the expected value of  $Y$ ,  $E(Y) \in \{0.1, 0.25\}$ , the number of covariates  $K \in \{2, 5, 10\}$ , the value of  $\beta_1 \in \{0, 0.35, 1.39, 2.77\}$  and the sample size  $N \in \{80, 200, 500\}$  for all simulated scenarios. The results for FC and ML+ISS for  $E(Y) = 0.1$ ,  $K = 10$  and  $N = 80$  are outside of the plot range. FC, Firth's correction; ML+ISS, maximum likelihood combined with the increasing sample size approach; FC+ISS, Firth's correction combined with the increasing sample size approach.
